# Supplementary material
Source: MDPI journal article supplement (https://www.mdpi.com/2073-4441/14/10/1639)
Supplement: s1 [file s1]

# Supplementary Materials:

**Table S1.** Sequences of PCR primers.

| Target                   | Primer Sequence (5'→3')                           | Amplicon Size (bp) | References           |
|--------------------------|---------------------------------------------------|--------------------|----------------------|
| <i>tetA</i>              | F:GCTACATCCTGCCTTC<br>R:GCATAGATCGGAAGAG          | 211                | Alves et al., 2014   |
| <i>tetB</i>              | F:TCATTGCCGACCTCAG<br>R:CCAACCATCACCATCC          | 391                | Alves et al., 2014   |
| <i>bla<sub>TEM</sub></i> | F:AAAGATGCTGAAGATCA<br>R:TTTGGTATGGCTTCATTC       | 425                | Alves et al., 2014   |
| <i>sul1</i>              | F:CTGAACGATATCCAAGGATTYCC<br>R:AAAAATCCCACGGRTC   | 239                | Alves et al., 2014   |
| <i>qnrA</i>              | F:TTCTCACGCCAGGATTTG<br>R:CCATCCAGATCGGCAAA       | 521                | Veldman et al., 2011 |
| <i>qnrB</i>              | F:GGMATHGAAATTCGCCACTG<br>R:TTYGCBGYCGCCAGTCG     | 261                | Veldman et al., 2011 |
| <i>qnrC</i>              | F:TGAATTATT CCCATAAAACG<br>R:TGTCTGGAATAACAATCACC | 447                | Veldman et al., 2011 |
| <i>qnrD</i>              | F:CGGGG AATAGAGTTAAAAAT<br>R:TATCGGTGAACAATAACACC | 592                | Veldman et al., 2011 |
| <i>qnrS</i>              | F:GCAAGTTCATTGAACAGGGT<br>R:TCTAAACCGTCGAGTTCGGCG | 428                | Veldman et al., 2011 |
| <i>int11</i>             | F: ACGAGCGCAAGGTTTCGGT<br>R: GAAAGGTCTGGTCATACATG | 565                | Wang, 2015           |
| <i>int12</i>             | F: GTGCAACGCATTTTGCAGG<br>R: CAACGGAGTCATGCAGATG  | 403                | Wang, 2015           |
| <i>Int1</i>              | F:GGCATAACAAGCAGCAAGC<br>R:AAGCAGACTTGACCTGAT     | variable           | Wang, 2015           |

**Table S2.** Antibigram of multidrug-resistant *E. coli* in seawater.

| Antibiotics No. | No. of Isolates | Antibiogram (No. of Isolates)                                                      |
|-----------------|-----------------|------------------------------------------------------------------------------------|
| 3               | 7               | TMP-TCY-CIP (1); TMP-SXT-TCY (3); TMP-SXT-CIP (2); TMP-SXT-CEP (1)                 |
| 4               | 5               | TMP-SXT-TCY-CIP (1); TMP-SXT-TCY-CEP (1); TMP-SXT-TCY-GEN (1); TMP-SXT-GEN-STR (2) |
| 5               | 1               | TMP-SXT-TCY-GEN-STR (1)                                                            |
| 8               | 2               | TMP-SXT-TCY-GEN-STR-CIP-CHL-LVX (2)                                                |

**Table S3.** Correlation analysis between antibiotic resistance phenotypes of *E. coli* isolates from bathing beach.

|                  |     | Tetracycline<br>s | Sulfonamides | Aminoglycoside<br>s |          | $\beta$ -Lactams | Quinolones |         | Phenicol |     |
|------------------|-----|-------------------|--------------|---------------------|----------|------------------|------------|---------|----------|-----|
|                  |     | TCY               | TMP          | SXT                 | STR      | GEN              | CEP        | CIP     | LVX      | CHL |
| Tetracyclines    | TCY | 1                 |              |                     |          |                  |            |         |          |     |
| Sulfonamides     | TMP | -0.056            | 1            |                     |          |                  |            |         |          |     |
|                  | SXT | 0.159             | 0.688**      | 1                   |          |                  |            |         |          |     |
| Aminoglycosides  | STR | 0.045             | 0.349        | 0.425*              | 1        |                  |            |         |          |     |
|                  | GEN | 0.180             | 0.271        | 0.369*              | 0.812**  | 1                |            |         |          |     |
| $\beta$ -lactams | CEP | -0.131            | -0.192       | -0.102              | -0.192   | -0.237           | 1          |         |          |     |
| Quinolones       | CIP | -0.134            | 0.071        | 0.050               | 0.106    | -0.005           | -0.280     | 1       |          |     |
|                  | LVX | 0.238             | 0.209        | 0.254               | 0.599 ** | 0.486 **         | -0.115     | 0.411 * | 1        |     |
| Phenicol         | CHL | 0.297             | 0.036        | 0.099               | 0.450 *  | 0.345            | -0.144     | 0.271   | 0.802 ** | 1   |

Note: \*\*  $p < 0.01$ ; \*  $p < 0.05$ .

**Table S4.** Prevalence of resistance genes detected in the *E. coli* strains from seawater and beach sand, and Fisher's exact tests correlation analysis of phenotypic resistance profile and relative genotypic resistance profile.

| AR Phenotype (No. Resistant) | Associated<br>ARGs Tested | Genome DNA Positive PCR Results |          | Asymptotic Significance ( $p$<br>Value) |
|------------------------------|---------------------------|---------------------------------|----------|-----------------------------------------|
|                              |                           | Seawater (%)                    | Sand (%) |                                         |
| Tetracyclines (17)           | <i>tetA</i>               | 11 (65%)                        | -        | 0                                       |
|                              | <i>tetB</i>               | 7 (41%)                         | -        | 0.009                                   |
| Cephalosporins (5)           | <i>bla<sub>TEM</sub></i>  | 4 (80%)                         | -        | 0                                       |
| Sulfonamide (16)             | <i>sul 1</i>              | 9 (56%)                         | -        | 0.012                                   |
| Quinolones (9)               | <i>qnrA</i>               | -                               | -        | -                                       |
|                              | <i>qnrB</i>               | -                               | -        | -                                       |
|                              | <i>qnrC</i>               | -                               | -        | -                                       |
|                              | <i>qnrD</i>               | -                               | -        | -                                       |
|                              | <i>qnrS</i>               | -                               | -        | -                                       |
